# Supplementary material
Source: PubMed Central journal article supplement (PMC3248302)
Supplement: JCI59411sd.pdf [file JCI59411sd.pdf]

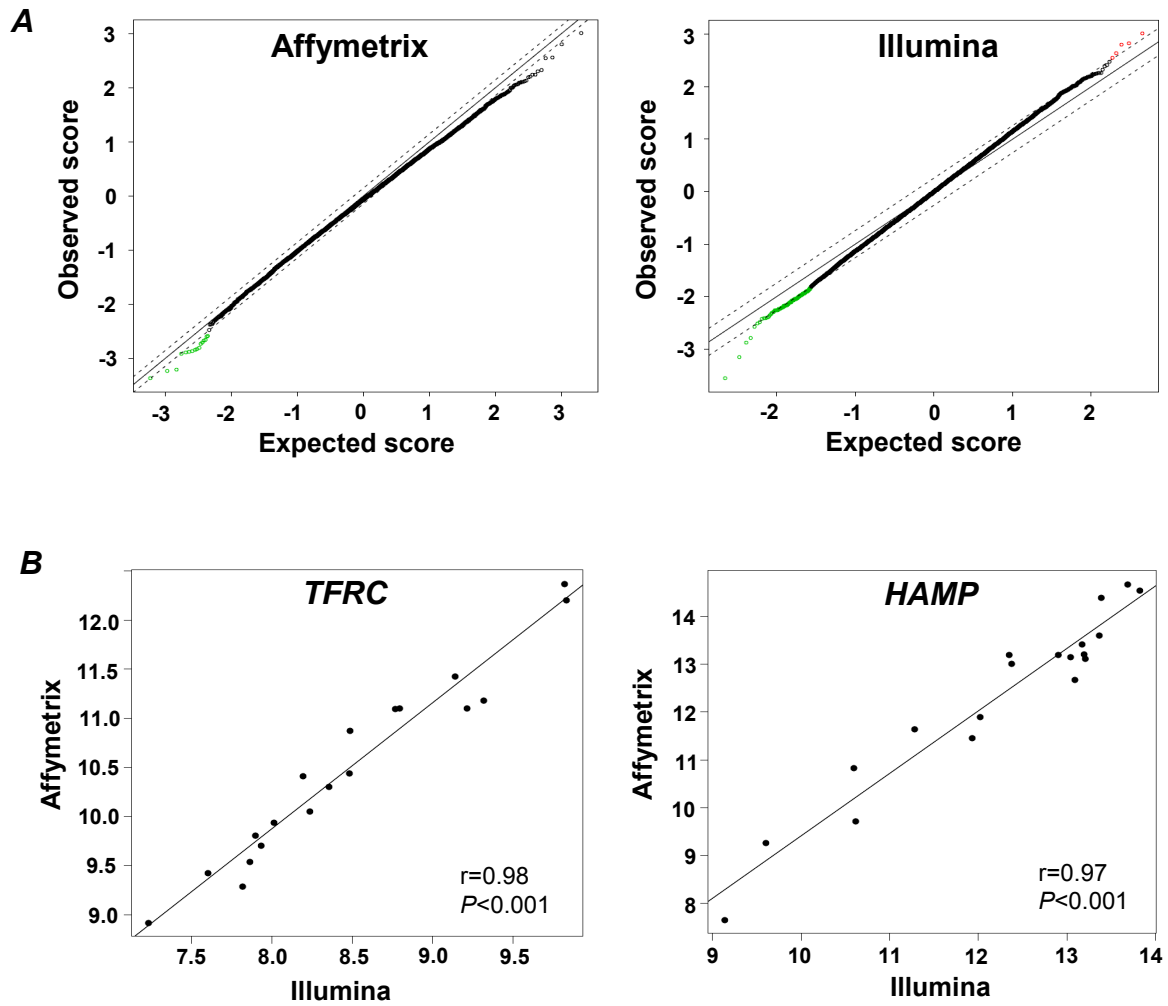

**Supplementary Figure 1:** Interplatform comparison of Affymetrix and Illumina microarray results of intra-graft gene expression. (A) QQ plots show the probability distributions of the differential gene expression values between TOL and Non-TOL samples analyzed on the Illumina (left panel) and Affymetrix (right panel) microarray platforms. The solid line  $y=x$  indicates the line where the observed expression differences are identical to the expected differences (random normal distribution). Each point corresponds to a probe set. Probe sets in green or red that deviated from the linear relationship to the theoretical t-statistic correspond to genes differentially expressed between the two conditions with FDR <25% (Affymetrix 16 probes, Illumina 176 probes). (B) Correlation between the expression levels (log<sub>2</sub> fluorescent signal) of *HAMP* and *TFRC* as assessed by Illumina and Affymetrix microarrays.

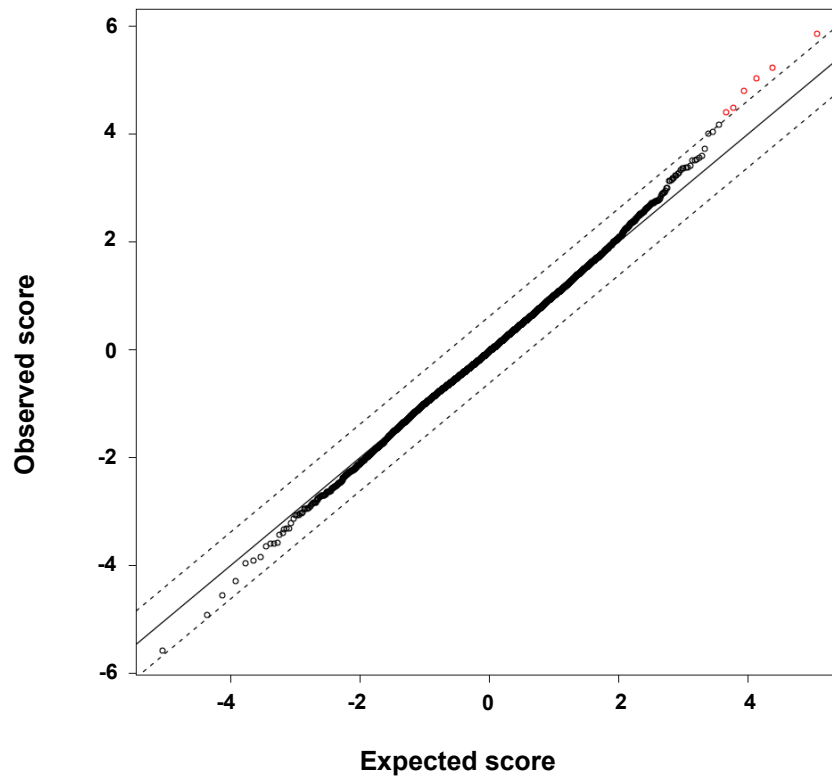

| Accession number | Gene symbol | Gene name                                    | Fold Change | FDR   |
|------------------|-------------|----------------------------------------------|-------------|-------|
| NM_000900        | MGP         | matrix Gla protein                           | 2,51        | 0,00  |
| AW007532         | IGFBP5      | insulin-like growth factor binding protein 5 | 1,55        | 0,00  |
| AU146646         | ANK3        | ankyrin 3, node of Ranvier (ankyrin G)       | 1,59        | 0,00  |
| NM_000609        | CXCL12      | chemokine (C-X-C motif) ligand 12            | 1,30        | 16,58 |
| AI799915         | DDR2        | discoidin domain receptor tyrosine kinase 2  | 1,37        | 16,58 |
| AA778095         | NA          | NA                                           | 1,34        | 16,58 |

**Supplementary Figure 2:** Paired comparison of intra-graft Affymetrix microarray transcriptional profiles from 5 TOL recipients before initiating drug minimization and 12 months after complete drug withdrawal. The QQ plot in the upper panel show the probability distribution of paired differential gene expression values. The solid line  $y=x$  indicates the line where the observed expression differences are identical to the expected differences (random normal distribution). Probe sets exhibiting differential expression should deviate from the linear relationship to the theoretical t-statistic (6 probe sets in red,  $FDR < 25\%$ ). The lower panel displays the name and symbol of the 6 genes with differential gene expression between the two time points analyzed. Abbreviations: FDR (false discovery rate).

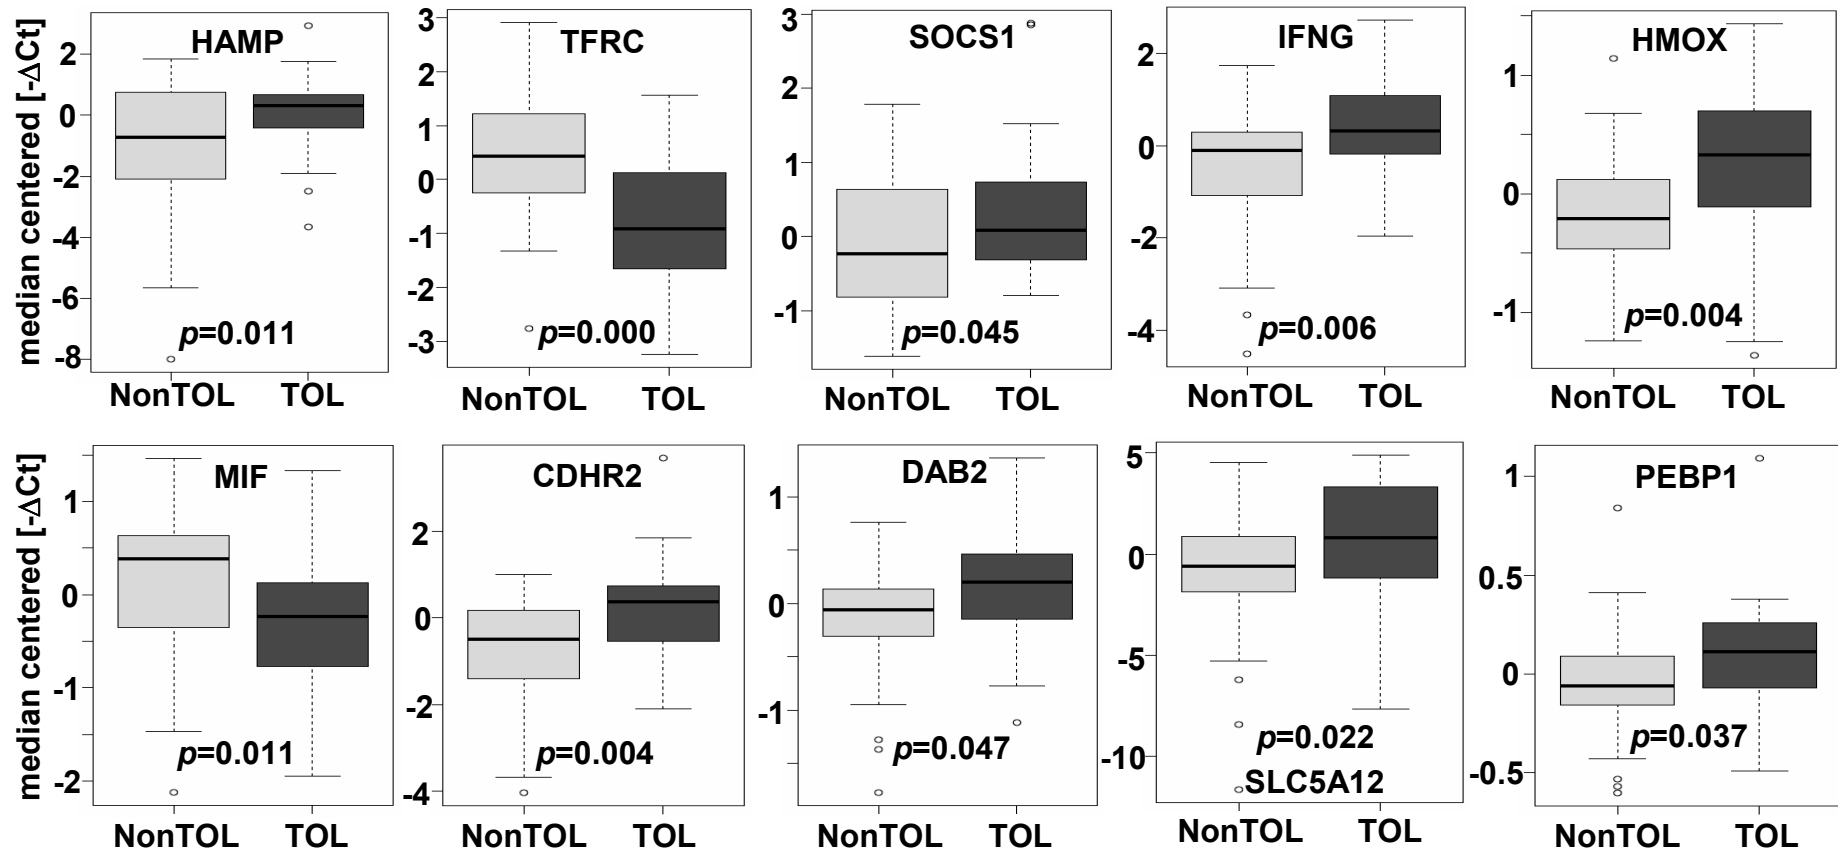

**Supplementary Figure 3:** Paired comparison of the 10 most differentially expressed genes as measured by qPCR intra-graft gene expression in TOL and NonTOL recipients before initiating drug minimization. All patients were enrolled at Hospital Clinic Barcelona only. Data is expressed as change in negative median centered delta Ct ( $-\Delta Ct$ ). Significance is given as  $p$ -value of comparisons between NonTOL and TOL recipients. Box plots display medians for each category (center line) interquartile range (box upper and lower boundaries) and minimum and maximum (whiskers). Outlier values are depicted by circles.

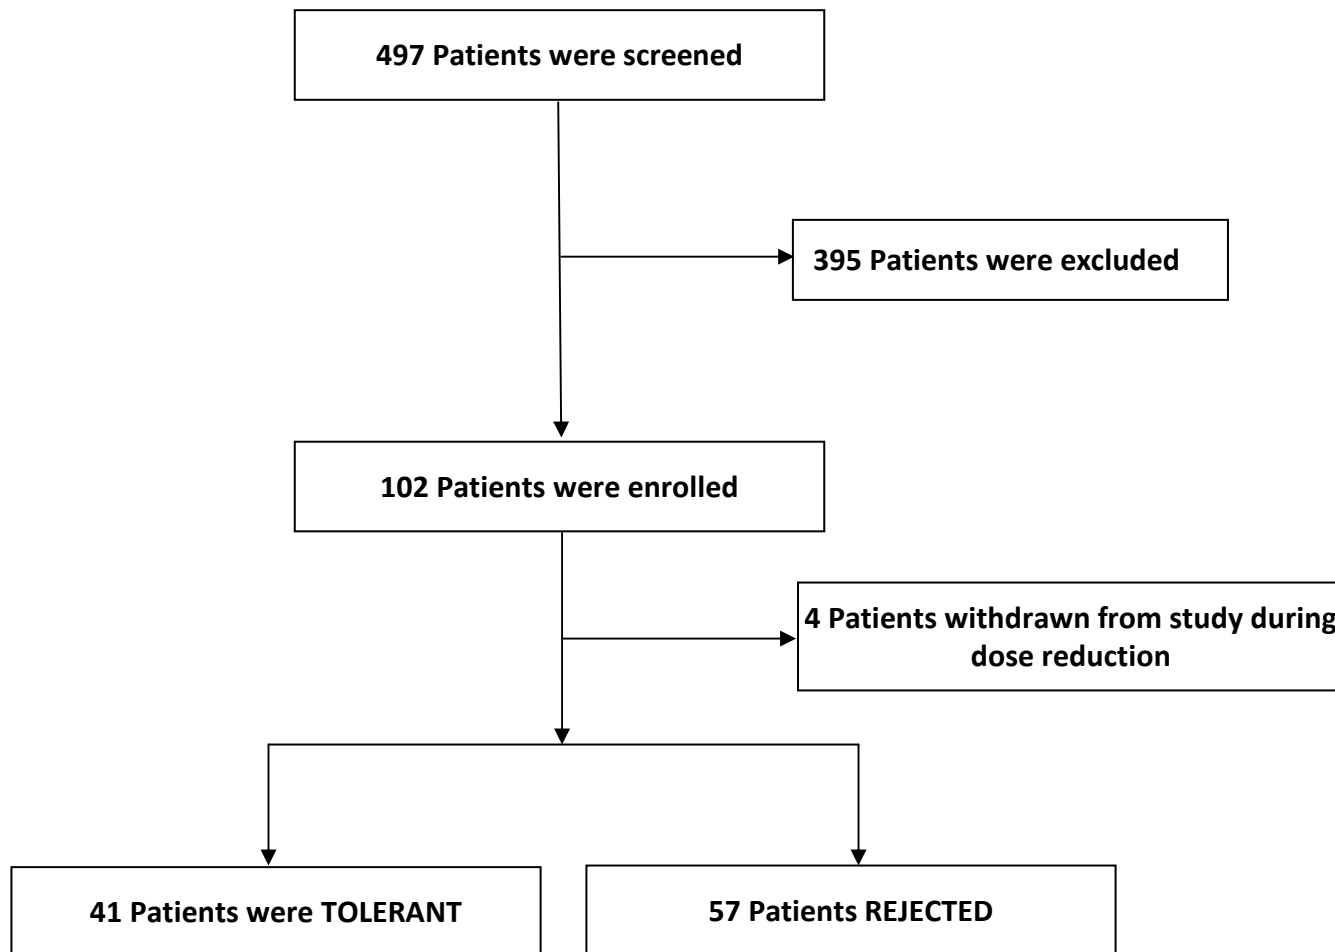

**Supplementary Figure 4:** Patient enrolment

**Supplementary Table 1: Histopathology findings in liver biopsies obtained during the course of the study\***

| Histological Evaluation                                                                                                                                                                                       |  | Baseline     |          | Rejection | 12-month post-weaning |
|---------------------------------------------------------------------------------------------------------------------------------------------------------------------------------------------------------------|--|--------------|----------|-----------|-----------------------|
|                                                                                                                                                                                                               |  | Non-tolerant | Tolerant |           |                       |
| <b>Number of patients</b>                                                                                                                                                                                     |  | 57           | 41       | 51        | 39                    |
| <b>Number of complete portal tracts</b>                                                                                                                                                                       |  | 7 (1-34)     | 7 (1-22) | 9 (2-22)  | 7 (2-18)              |
| <b>Number of central veins</b>                                                                                                                                                                                |  | 5 (0-19)     | 4 (0-18) | 7 (0-13)  | 5 (0-13)              |
| <b>Lobular inflammation</b>                                                                                                                                                                                   |  | 0 (0-2)      | 0 (0-2)  | 1 (0-2)   | 1 (0-2)               |
| 0 No<br>1 Sinusoidal cells and/or mild focal necrosis<br>2 Moderate, multiple necro-inflammatory foci<br>3 Marked, confluent or bridging necrosis                                                             |  |              |          |           |                       |
| <b>Central perivenulitis (with or without endothelitis)</b>                                                                                                                                                   |  | 0 (0-2)      | 0 (0-2)  | 0 (0-3)   | 0 (0-2)               |
| 0 No<br>1 Patchy, focal perivenular inflammation<br>2 Perivenulitis is most of the central veins<br>3 Marked (confluent or bridging hepatocellular necrosis)                                                  |  |              |          |           |                       |
| <b>Portal inflammation</b>                                                                                                                                                                                    |  | 1 (0-2)      | 1 (0-2)  | 2 (1-3)   | 1 (0-2)               |
| 0 No<br>1 Mild (small groups of inflammatory cells)<br>2 Moderate (>50% of the portal tracts, expansive)<br>3 Marked                                                                                          |  |              |          |           |                       |
| <b>Interfase hepatitis</b>                                                                                                                                                                                    |  | 0 (0-2)      | 0 (0-2)  | 1 (0-3)   | 0 (0-2)               |
| 0 No<br>1 Mild<br>2 Moderate<br>3 Severe                                                                                                                                                                      |  |              |          |           |                       |
| <b>Bile duct lesions</b>                                                                                                                                                                                      |  | 0 (0-1)      | 0 (0-1)  | 1 (0-3)   | 0 (0-2)               |
| 0 No<br>1 Minimal (intraepithelial inflammatory cells or abnormal colangiocytes)<br>2 Moderate (epithelial lesions in most portal tracts, no destruction)<br>3 Marked (destructive lesions of the bile ducts) |  |              |          |           |                       |
| <b>Bile duct loss</b>                                                                                                                                                                                         |  | 0 (0-1)      | 0        | 0 (0-1)   | 0 (0-1)               |
| 0 No<br>1 < 50%<br>2 ≥ 50%                                                                                                                                                                                    |  |              |          |           |                       |
| <b>Portal vein branches</b>                                                                                                                                                                                   |  | 0 (0-2)      | 0 (0-2)  | 0 (0-2)   | 0 (0-2)               |
| 0 Present in all portal tracts<br>1 Absent in a minority of portal tracts<br>2 Absent in most of the portal tracts                                                                                            |  |              |          |           |                       |
| <b>Portal vein endothelitis</b>                                                                                                                                                                               |  | 0 (0-1)      | 0 (0-1)  | 1 (0-3)   | 0 (0-2)               |
| 0 No<br>1 Mild, in the minority of portal veins<br>2 Mild, in most of the portal veins<br>3 Marked                                                                                                            |  |              |          |           |                       |
| <b>Portal fibrosis</b>                                                                                                                                                                                        |  | 0 (0-2)      | 0 (0-2)  | 1 (0-3)   | 0 (0-2)               |
| 0 No<br>1 Minimal (minority of portal tracts)<br>2 Moderate (most of the portal tracts, periportal expansion)<br>3 Marked (bridging fibrosis)<br>4 Cirrhosis                                                  |  |              |          |           |                       |
| <b>Perisinusoidal fibrosis</b>                                                                                                                                                                                |  | 0 (0-1)      | 0 (0-2)  | 0 (0-2)   | 0 (0-2)               |
| 0 No<br>1 Focal patchy<br>2 Prominent                                                                                                                                                                         |  |              |          |           |                       |

\* Values are median (range)

**Supplementary Table 2: List of samples collected and tests performed on enrolled recipients.**

| Num | Patient group <sup>A</sup> | Center <sup>B</sup> | Liver tissue Illumina microarrays <sup>C</sup> |     | Affymetrix microarrays <sup>C</sup> |                  |          | Liver tissue qPCR <sup>C</sup> |     | Serum hepcidin measurements <sup>D</sup> |     |
|-----|----------------------------|---------------------|------------------------------------------------|-----|-------------------------------------|------------------|----------|--------------------------------|-----|------------------------------------------|-----|
|     |                            |                     | 1st                                            | 2nd | Liver Tissue 1st                    | Liver Tissue 2nd | PBMC 1st | 1st                            | 2nd | 1st                                      | 2nd |
| 1   | TOL                        | B                   | •                                              |     | •                                   |                  | •        | •                              |     | •                                        | •   |
| 2   | TOL                        | B                   | •                                              |     | •                                   |                  |          | •                              |     | •                                        | •   |
| 3   | TOL                        | B                   | •                                              | •   |                                     |                  | •        |                                | •   | •                                        | •   |
| 4   | TOL                        | B                   | •                                              |     | •                                   |                  | •        | •                              | •   | •                                        |     |
| 5   | TOL                        | B                   | •                                              |     |                                     |                  | •        | •                              |     | •                                        | •   |
| 6   | TOL                        | B                   | •                                              |     |                                     |                  | •        | •                              | •   | •                                        | •   |
| 7   | TOL                        | B                   | •                                              |     |                                     |                  | •        | •                              |     | •                                        |     |
| 8   | TOL                        | B                   | •                                              |     |                                     |                  | •        | •                              |     |                                          | •   |
| 9   | TOL                        | B                   | •                                              | •   | •                                   | •                | •        | •                              | •   | •                                        | •   |
| 10  | TOL                        | B                   | •                                              |     | •                                   |                  | •        | •                              |     | •                                        | •   |
| 11  | TOL                        | B                   | •                                              | •   |                                     |                  | •        | •                              | •   | •                                        | •   |
| 12  | TOL                        | R                   |                                                |     |                                     |                  |          | •                              |     | •                                        |     |
| 13  | TOL                        | R                   |                                                |     |                                     |                  |          | •                              |     |                                          |     |
| 14  | TOL                        | R                   |                                                |     |                                     |                  |          | •                              |     |                                          |     |
| 15  | TOL                        | R                   |                                                |     |                                     |                  |          | •                              |     | •                                        |     |
| 16  | TOL                        | R                   |                                                |     |                                     |                  |          | •                              |     |                                          |     |
| 17  | TOL                        | R                   |                                                |     |                                     |                  |          | •                              |     | •                                        |     |
| 18  | TOL                        | B                   | •                                              |     |                                     |                  | •        | •                              |     | •                                        | •   |
| 19  | TOL                        | B                   | •                                              |     |                                     |                  | •        | •                              | •   |                                          | •   |
| 20  | TOL                        | B                   | •                                              |     |                                     |                  | •        | •                              | •   | •                                        | •   |
| 21  | TOL                        | R                   |                                                |     |                                     |                  |          | •                              |     | •                                        |     |
| 22  | TOL                        | R                   |                                                |     |                                     |                  |          | •                              |     | •                                        |     |
| 23  | TOL                        | R                   |                                                |     |                                     |                  |          | •                              |     | •                                        |     |
| 24  | TOL                        | R                   |                                                |     |                                     |                  |          | •                              |     | •                                        |     |
| 25  | TOL                        | R                   |                                                |     |                                     |                  |          | •                              |     |                                          |     |
| 26  | TOL                        | R                   |                                                |     |                                     |                  |          | •                              |     |                                          |     |
| 27  | TOL                        | B                   | •                                              |     | •                                   | •                | •        | •                              |     | •                                        | •   |
| 28  | TOL                        | B                   | •                                              |     | •                                   | •                | •        | •                              | •   | •                                        | •   |
| 29  | TOL                        | B                   | •                                              |     | •                                   | •                | •        |                                | •   |                                          |     |
| 30  | TOL                        | B                   | •                                              |     | •                                   | •                | •        | •                              | •   | •                                        |     |
| 31  | TOL                        | B                   | •                                              |     |                                     |                  | •        | •                              | •   | •                                        |     |
| 32  | TOL                        | B                   | •                                              |     |                                     |                  | •        | •                              | •   | •                                        |     |
| 33  | TOL                        | B                   |                                                |     |                                     |                  | •        | •                              | •   |                                          |     |
| 34  | Non-TOL                    | B                   | •                                              | •   | •                                   |                  |          | •                              |     | •                                        | •   |
| 35  | Non-TOL                    | B                   | •                                              | •   |                                     |                  | •        | •                              |     | •                                        | •   |

|    |         |   |   |   |   |  |   |   |  |   |   |
|----|---------|---|---|---|---|--|---|---|--|---|---|
| 36 | Non-TOL | B | • | • | • |  | • | • |  | • | • |
| 37 | Non-TOL | B | • | • | • |  |   | • |  | • | • |
| 38 | Non-TOL | B | • | • | • |  | • | • |  | • | • |
| 39 | Non-TOL | B | • | • | • |  | • | • |  | • | • |
| 40 | Non-TOL | B | • | • | • |  | • | • |  | • | • |
| 41 | Non-TOL | B | • | • | • |  | • | • |  | • | • |
| 42 | Non-TOL | B | • | • |   |  | • | • |  | • | • |
| 43 | Non-TOL | B | • | • | • |  | • | • |  |   |   |
| 44 | Non-TOL | B | • | • | • |  | • | • |  | • | • |
| 45 | Non-TOL | B | • | • |   |  | • | • |  | • | • |
| 46 | Non-TOL | B | • | • | • |  | • | • |  | • | • |
| 47 | Non-TOL | B | • | • |   |  |   |   |  | • | • |
| 48 | Non-TOL | B | • | • |   |  | • | • |  | • | • |
| 49 | Non-TOL | B | • | • |   |  | • | • |  | • | • |
| 50 | Non-TOL | R |   |   |   |  |   | • |  |   |   |
| 51 | Non-TOL | R |   |   |   |  |   | • |  | • | • |
| 52 | Non-TOL | R |   |   |   |  |   | • |  |   | • |
| 53 | Non-TOL | R |   |   |   |  |   | • |  | • | • |
| 54 | Non-TOL | L |   |   |   |  |   | • |  | • |   |
| 55 | Non-TOL | L |   |   |   |  |   | • |  | • |   |
| 56 | Non-TOL | B |   |   |   |  | • | • |  |   |   |
| 57 | Non-TOL | B |   |   |   |  | • | • |  | • | • |
| 58 | Non-TOL | B | • | • |   |  | • | • |  | • | • |
| 59 | Non-TOL | B | • |   |   |  | • | • |  | • | • |
| 60 | Non-TOL | B | • |   |   |  | • | • |  | • | • |
| 61 | Non-TOL | B | • |   |   |  | • | • |  | • | • |
| 62 | Non-TOL | R |   |   |   |  |   | • |  | • |   |
| 63 | Non-TOL | R |   |   |   |  |   | • |  | • |   |
| 64 | Non-TOL | R |   |   |   |  |   | • |  |   |   |
| 65 | Non-TOL | R |   |   |   |  |   | • |  | • |   |
| 66 | Non-TOL | R |   |   |   |  |   | • |  | • |   |
| 67 | Non-TOL | B |   |   |   |  | • | • |  | • | • |
| 68 | Non-TOL | B | • |   |   |  | • |   |  | • | • |
| 69 | Non-TOL | B | • |   |   |  | • | • |  | • | • |
| 70 | Non-TOL | B | • |   |   |  | • | • |  | • |   |
| 71 | Non-TOL | B |   |   |   |  | • | • |  |   |   |
| 72 | Non-TOL | B | • |   |   |  | • |   |  | • | • |
| 73 | Non-TOL | B | • |   |   |  | • | • |  |   |   |
| 74 | Non-TOL | B |   |   |   |  | • | • |  |   |   |
| 75 | Non-TOL | B |   |   |   |  | • | • |  |   |   |
| 76 | HEPC    | B | • |   |   |  |   |   |  |   |   |
| 77 | HEPC    | B | • |   |   |  |   |   |  |   |   |
| 78 | HEPC    | B | • |   |   |  |   |   |  |   |   |
| 79 | HEPC    | B | • |   |   |  |   |   |  |   |   |
| 80 | HEPC    | B | • |   |   |  |   |   |  |   |   |
| 81 | HEPC    | B | • |   |   |  |   |   |  |   |   |
| 82 | HEPC    | B | • |   |   |  |   |   |  |   |   |

|     |         |   |   |  |  |  |  |   |  |  |  |
|-----|---------|---|---|--|--|--|--|---|--|--|--|
| 83  | HEPC    | B | • |  |  |  |  |   |  |  |  |
| 84  | HEPC    | B | • |  |  |  |  |   |  |  |  |
| 85  | HEPC    | B | • |  |  |  |  |   |  |  |  |
| 86  | HEPC    | B | • |  |  |  |  |   |  |  |  |
| 87  | HEPC    | B | • |  |  |  |  |   |  |  |  |
| 88  | REJ     | B | • |  |  |  |  |   |  |  |  |
| 89  | REJ     | B | • |  |  |  |  |   |  |  |  |
| 90  | REJ     | B | • |  |  |  |  |   |  |  |  |
| 91  | REJ     | B | • |  |  |  |  |   |  |  |  |
| 92  | REJ     | B | • |  |  |  |  |   |  |  |  |
| 93  | REJ     | B | • |  |  |  |  |   |  |  |  |
| 94  | REJ     | B | • |  |  |  |  |   |  |  |  |
| 95  | REJ     | B | • |  |  |  |  |   |  |  |  |
| 96  | REJ     | B | • |  |  |  |  |   |  |  |  |
| 97  | CONT-Tx | B | • |  |  |  |  | • |  |  |  |
| 98  | CONT-Tx | B | • |  |  |  |  | • |  |  |  |
| 99  | CONT-Tx | B | • |  |  |  |  | • |  |  |  |
| 100 | CONT-Tx | B | • |  |  |  |  | • |  |  |  |
| 101 | CONT-Tx | B | • |  |  |  |  | • |  |  |  |
| 102 | CONT-Tx | B | • |  |  |  |  | • |  |  |  |
| 103 | CONT-Tx | B | • |  |  |  |  | • |  |  |  |
| 104 | CONT-Tx | B | • |  |  |  |  | • |  |  |  |
| 105 | CONT    | B | • |  |  |  |  | • |  |  |  |
| 106 | CONT    | B | • |  |  |  |  | • |  |  |  |
| 107 | CONT    | B | • |  |  |  |  | • |  |  |  |
| 108 | CONT    | B | • |  |  |  |  | • |  |  |  |
| 109 | CONT    | B | • |  |  |  |  | • |  |  |  |
| 110 | CONT    | B | • |  |  |  |  | • |  |  |  |
| 111 | CONT    | B | • |  |  |  |  | • |  |  |  |
| 112 | CONT    | B | • |  |  |  |  | • |  |  |  |
| 113 | CONT    | B | • |  |  |  |  | • |  |  |  |
| 114 | CONT    | B | • |  |  |  |  | • |  |  |  |

<sup>A</sup> Patient groups: TOL (tolerant), Non-TOL (non-tolerant), HEPC (liver recipients with recurrent hepatitis C), REJ (liver recipients with acute cellular rejection), CONT-Tx (liver recipients with normal liver histology 1 year after transplantation), CONT (non-transplanted patients undergoing surgery for colorectal liver metastases).

<sup>B</sup> Center: B=Hospital Clinic Barcelona, R=University “Tor Vergata” Rome, L=University Hospitals Leuven.

<sup>C</sup> 1st denotes samples collected before initiation of drug minimization and 2nd<sup>nd</sup> denotes samples collected at the time of rejection (Non-TOL) or 12 months after complete drug withdrawal (TOL). Peripheral blood mononuclear cells (PBMCs) were collected before initiation of drug minimization.

<sup>D</sup> 1st denotes samples collected before initiation of drug minimization and 2nd<sup>nd</sup> denotes samples collected 12 months after rejection (Non-TOL) or 12 months after complete drug withdrawal (TOL).



**Supplementary Table 3: Genes differentially expressed at the time of liver allograft rejection <sup>A</sup>**

| Gene symbol     | FDR   | Fold-change TOL versus Non-TOL | Name                                                                |
|-----------------|-------|--------------------------------|---------------------------------------------------------------------|
| <i>DOCK2</i>    | 0.000 | -1.465                         | Dedicator of cytokinesis 2                                          |
| <i>OBFC2A</i>   | 0.000 | -1.254                         | Oligonucleotide/oligosaccharide-binding fold containing 2A          |
| <i>CCL3L1</i>   | 0.000 | -1.095                         | Chemokine (C-C motif) ligand 3-like 1                               |
| <i>CD72</i>     | 0.000 | -1.589                         | CD72 molecule                                                       |
| <i>TAP2</i>     | 0.000 | -1.506                         | Transporter 2, ATP-binding cassette, sub-family B (                 |
| <i>IL18BP</i>   | 0.000 | -2.038                         | Interleukin 18 binding protein                                      |
| <i>LILRB3</i>   | 0.000 | -1.234                         | Leukocyte immunoglobulin-like receptor, subfamily B                 |
| <i>CXCL9</i>    | 0.000 | -3.505                         | Homo sapiens chemokine (C-X-C motif) ligand 9                       |
| <i>CXCL10</i>   | 0.000 | -2.592                         | Chemokine (C-X-C motif) ligand 10                                   |
| <i>HS3ST2</i>   | 0.000 | -1.089                         | Heparan sulfate 3-O-sulfotransferase 2                              |
| <i>WARS</i>     | 0.000 | -1.658                         | Tryptophanyl-tRNA synthetase                                        |
| <i>PLEK</i>     | 0.000 | -1.620                         | Pleckstrin                                                          |
| <i>ARHGAP9</i>  | 0.000 | -1.521                         | Rho GTPase activating protein 9 (                                   |
| <i>PYHIN1</i>   | 0.000 | -1.079                         | Pyrin and HIN domain family, member 1                               |
| <i>UBE2C</i>    | 0.000 | -1.518                         | Ubiquitin-conjugating enzyme E2C                                    |
| <i>HMMR</i>     | 0.000 | -1.549                         | Hyaluronan-mediated motility receptor                               |
| <i>APOBEC3B</i> | 0.000 | -1.069                         | Apolipoprotein B mRNA editing enzyme, catalytic polypeptide-like 3B |
| <i>OLR1</i>     | 0.000 | -1.148                         | Oxidized low density lipoprotein (lectin-like) receptor 1           |
| <i>HLA-F</i>    | 0.000 | -1.781                         | Major histocompatibility complex, class I, F                        |
| <i>HLA-DRA</i>  | 0.000 | -1.735                         | Major histocompatibility complex, class II, DR alpha                |
| <i>PTTG1</i>    | 0.000 | -1.749                         | Pituitary tumor-transforming 1                                      |
| <i>CD8A</i>     | 0.000 | -2.671                         | CD8a molecule (CD8A), transcript variant 2, mRNA.                   |
| <i>SLC1A3</i>   | 0.000 | -1.512                         | Solute carrier family 1 member 3                                    |
| <i>IGSF6</i>    | 0.000 | -1.368                         | Immunoglobulin superfamily, member 6                                |
| <i>IFNG</i>     | 0.000 | -1.174                         | Interferon, gamma (IFNG)                                            |
| <i>IRF8</i>     | 0.000 | -1.364                         | Interferon regulatory factor 8                                      |
| <i>ITGB2</i>    | 0.000 | -1.532                         | Integrin, beta 2                                                    |
| <i>IL32</i>     | 0.000 | -1.846                         | Interleukin 32                                                      |
| <i>ABHD4</i>    | 0.000 | 1.009                          | Abhydrolase domain containing 4                                     |
| <i>STAT1</i>    | 0.000 | -1.836                         | Signal transducer and activator of transcription 1,                 |
| <i>LAIR2</i>    | 0.000 | -1.296                         | Leukocyte-associated immunoglobulin-like receptor 2                 |
| <i>CD2</i>      | 0.000 | -1.676                         | CD2 molecule                                                        |
| <i>CTLA4</i>    | 0.000 | -1.450                         | Cytotoxic T-lymphocyte-associated protein 4                         |
| <i>GBP1</i>     | 0.000 | -1.670                         | Guanylate binding protein 1, interferon-inducible,                  |
| <i>STAT1</i>    | 0.000 | -1.999                         | Signal transducer and activator of transcription 1,.                |
| <i>EZH2</i>     | 0.000 | -1.269                         | Enhancer of zeste homolog 2                                         |
| <i>FABP5</i>    | 0.000 | -1.838                         | Fatty acid binding protein 5                                        |
| <i>CD83</i>     | 0.000 | -1.470                         | CD83 molecule                                                       |
| <i>RAD51AP1</i> | 0.000 | -1.312                         | Homo sapiens RAD51 associated protein 1                             |
| <i>HMMR</i>     | 0.000 | -1.130                         | Homo sapiens hyaluronan-mediated motility receptor                  |
| <i>CCL4L2</i>   | 0.000 | -1.424                         | Homo sapiens chemokine (C-C motif) ligand 4-like 2                  |
| <i>CXCR4</i>    | 0.000 | -1.287                         | Chemokine (C-X-C motif) receptor 4                                  |
| <i>TAP1</i>     | 0.000 | -1.752                         | Transporter 1, ATP-binding cassette, sub-family B (MDR/TAP)         |
| <i>SRGN</i>     | 0.000 | -1.607                         | Serglycin                                                           |
| <i>CD52</i>     | 0.000 | -1.551                         | CD52 molecule                                                       |
| <i>CD300LF</i>  | 0.000 | -1.315                         | CD300 molecule-like family member f                                 |
| <i>FAM113B</i>  | 0.000 | -1.425                         | Family with sequence similarity 113, member B                       |
| <i>FCGR1B</i>   | 0.000 | -1.370                         | Fc fragment of IgG, high affinity lb, receptor (CD64)               |
| <i>APOL3</i>    | 0.000 | -1.758                         | Apolipoprotein L, 3 (APOL3), transcript variant beta/a,             |
| <i>TLR8</i>     | 0.000 | -1.366                         | Toll-like receptor 8                                                |

<sup>A</sup> Table shows the 50 most significant targets. Illumina microarrays were employed to analyze sequential samples collected before initiation of drug minimization and at the time of graft rejection. Abbreviations: FDR (false discovery rate).

**Supplementary Table 4: Results of qPCR gene expression experiments on liver tissue samples from TOL and Non-TOL recipients <sup>A</sup>**

| <b>Gene</b>    | <b>P-value</b> | <b>Fold-change</b> | <b>Name</b>                                        | <b>Inclusion criteria</b> |
|----------------|----------------|--------------------|----------------------------------------------------|---------------------------|
| <i>TFRC</i>    | 0.000024       | -2.56              | transferrin receptor (p90, CD71)                   | Microarray                |
| <i>HAMP</i>    | 0.010525       | 2.063              | hepcidin antimicrobial peptide                     | Microarray                |
| <i>HMOX1</i>   | 0.004377       | 1.454              | heme oxygenase1                                    | Literature search         |
| <i>DAB2</i>    | 0.047391       | 1.197              | disabled homolog 2                                 | Microarray                |
| <i>MIF</i>     | 0.010830       | -1.54              | macrophage migration inhibitory factor             | Microarray                |
| <i>PEBP1</i>   | 0.037147       | 1.129              | phosphatidylethanolamine binding protein 1         | Microarray                |
| <i>SLC5A12</i> | 0.022330       | 2.657              | solute carrier family 5 (sodium/glucose)           | Microarray                |
| <i>CDHR2</i>   | 0.003954       | 1.815              | cadherin-related family member 2                   | Microarray                |
| <i>IFNG</i>    | 0.006279       | 1.338              | interferon, gamma                                  | Literature search         |
| <i>SOCS1</i>   | 0.044445       | 1.244              | suppressor of cytokine signaling 1                 | Literature search         |
| <i>TFR2</i>    | ns             | 1.096              | transferrin receptor 2                             | Literature search         |
| <i>FTH1</i>    | ns             | 1.045              | ferritin, heavy polypeptide 1                      | Literature search         |
| <i>MCOLN1</i>  | ns             | 1.165              | mucoilin 1                                         | Microarray                |
| <i>HFE</i>     | ns             | 1.229              | hemochromatosis                                    | Literature search         |
| <i>HFE2</i>    | ns             | 1.341              | hemochromatosis type 2 (juvenile)                  | Literature search         |
| <i>BMP2</i>    | ns             | 1.066              | bone morphogenetic protein 2                       | Literature search         |
| <i>BMP4</i>    | ns             | 1.034              | bone morphogenetic protein 4                       | Literature search         |
| <i>SMAD4</i>   | ns             | 1.088              | SMAD family member 4                               | Literature search         |
| <i>CP</i>      | ns             | -1.015             | ceruloplasmin (ferroxidase)                        | Literature search         |
| <i>ACSL1</i>   | ns             | -1.244             | acyl-CoA synthetase long-chain family member 1     | Microarray                |
| <i>UNG</i>     | ns             | -1.074             | uracil-DNA glycosylase                             | Microarray                |
| <i>TUBA4A</i>  | ns             | -1.185             | tubulin, alpha 4a                                  | Microarray                |
| <i>COG5</i>    | ns             | -1.021             | component of oligomeric golgi complex 5            | Microarray                |
| <i>ABAT</i>    | ns             | -1.113             | 4-aminobutyrate aminotransferase                   | Microarray                |
| <i>DTWD2</i>   | ns             | 1.052              | DTW domain containing 2                            | Microarray                |
| <i>POF1B</i>   | ns             | -1.092             | premature ovarian failure, 1B                      | Microarray                |
| <i>TIPARP</i>  | ns             | 1.032              | TCDD-inducible poly(ADP-ribose) polymerase         | Microarray                |
| <i>RBM23</i>   | ns             | -1.011             | RNA binding motif protein 23                       | Microarray                |
| <i>TTC3</i>    | ns             | 1.181              | tetratricopeptide repeat domain 3                  | Microarray                |
| <i>FABP4</i>   | ns             | 1.343              | fatty acid binding protein 4                       | Microarray                |
| <i>VNN3</i>    | ns             | 1.357              | vanin 3                                            | Microarray                |
| <i>ADORA3</i>  | ns             | 1.449              | adenosine A3 receptor                              | Microarray                |
| <i>TAF15</i>   | ns             | 1.133              | TATA box binding protein (TBP)-associated factor   | Microarray                |
| <i>TP53I3</i>  | ns             | 1.607              | tumor protein p53 inducible protein 3              | Microarray                |
| <i>SAGE1</i>   | ns             | 1.314              | sarcoma antigen 1                                  | Microarray                |
| <i>DPP4</i>    | ns             | -1.109             | dipeptidyl-peptidase 4                             | Microarray                |
| <i>MYO19</i>   | ns             | 1.041              | myosin XIX                                         | Microarray                |
| <i>SH2D1B</i>  | ns             | 1.133              | SH2 domain containing 1B                           | Microarray                |
| <i>TBX21</i>   | ns             | 1.290              | T-box 21                                           | Literature search         |
| <i>IRF1</i>    | ns             | 1.239              | interferon regulatory factor 1                     | Literature search         |
| <i>IRF3</i>    | ns             | 1.142              | interferon regulatory factor 3                     | Literature search         |
| <i>STAT1</i>   | ns             | 1.036              | signal transducer and activator of transcription 1 | Literature search         |
| <i>TNF</i>     | ns             | 1.092              | tumor necrosis factor (TNF superfamily, member 2)  | Literature search         |
| <i>TNFAIP3</i> | ns             | 1.250              | tumor necrosis factor, alpha-induced protein 3     | Literature search         |
| <i>IL6</i>     | ns             | 1.382              | interleukin 6                                      | Literature search         |
| <i>IL10</i>    | ns             | 2.473              | interleukin 10                                     | Literature search         |
| <i>GATA3</i>   | ns             | 1.128              | GATA binding protein 3                             | Literature search         |
| <i>IL1A</i>    | ns             | 5.704              | interleukin 1, alpha                               | Literature search         |
| <i>IL1B</i>    | ns             | -1.414             | interleukin 1, beta                                | Literature search         |
| <i>IL18</i>    | ns             | 1.120              | interleukin 18 (interferon-gamma-inducing factor)  | Literature search         |
| <i>IL18BP</i>  | ns             | 1.381              | interleukin 18 binding protein                     | Literature search         |
| <i>IL32</i>    | ns             | -1.532             | interleukin 32                                     | Literature search         |
| <i>CCL3</i>    | ns             | 1.247              | chemokine (C-C motif) ligand 3                     | Literature search         |
| <i>CXCR3</i>   | ns             | 1.216              | chemokine (C-X-C motif) receptor 3                 | Literature search         |
| <i>CXCR7</i>   | ns             | 1.183              | chemokine (C-X-C motif) receptor 7                 | Literature search         |
| <i>CXCL9</i>   | ns             | -1.120             | chemokine (C-X-C motif) ligand 9                   | Literature search         |

|                 |    |        |                                                          |                   |
|-----------------|----|--------|----------------------------------------------------------|-------------------|
| <i>CXCL10</i>   | ns | 1.211  | chemokine (C-X-C motif) ligand 10                        | Literature search |
| <i>CXCL11</i>   | ns | 1.246  | chemokine (C-X-C motif) ligand 11                        | Literature search |
| <i>CCL21</i>    | ns | 1.365  | chemokine (C-C motif) ligand 21                          | Literature search |
| <i>CD3D</i>     | ns | 1.036  | CD3d molecule, delta (CD3-TCR complex)                   | Literature search |
| <i>CD8A</i>     | ns | -1.088 | CD8a molecule                                            | Literature search |
| <i>MS4A1</i>    | ns | -1.043 | membrane-spanning 4/CD20 B-cell differentiation          | Literature search |
| <i>CD37</i>     | ns | 1.236  | CD37 molecule                                            | Literature search |
| <i>FOXP3</i>    | ns | -1.354 | forkhead box P3                                          | Literature search |
| <i>TGFB1</i>    | ns | 1.311  | transforming growth factor, beta 1                       | Literature search |
| <i>CD274</i>    | ns | 1.343  | CD274 molecule                                           | Literature search |
| <i>FCER2</i>    | ns | -1.317 | Fc fragment of IgE, low affinity II, receptor for (CD23) | Literature search |
| <i>HLA-E</i>    | ns | 1.096  | major histocompatibility complex, class I, E             | Literature search |
| <i>HLA-G</i>    | ns | -3.054 | major histocompatibility complex, class I, G             | Literature search |
| <i>MICA</i>     | ns | 1.279  | MHC class I polypeptide-related sequence A               | Literature search |
| <i>MICB</i>     | ns | 1.080  | MHC class I polypeptide-related sequence B               | Literature search |
| <i>TLR4</i>     | ns | 1.006  | toll-like receptor 4                                     | Literature search |
| <i>TLR8</i>     | ns | -1.042 | toll-like receptor 8                                     | Literature search |
| <i>MYD88</i>    | ns | 1.005  | myeloid differentiation primary response gene (88)       | Literature search |
| <i>C3</i>       | ns | 1.075  | complement component 3                                   | Literature search |
| <i>NOS2</i>     | ns | -1.026 | nitric oxide synthase 2, inducible                       | Literature search |
| <i>PDCD1</i>    | ns | 1.430  | programmed cell death 1                                  | Literature search |
| <i>PDCD1LG2</i> | ns | 1.191  | programmed cell death 1 ligand 2                         | Literature search |
| <i>BCL2</i>     | ns | 1.061  | B-cell CLL/lymphoma 2                                    | Literature search |
| <i>FAS</i>      | ns | -2.210 | Fas (TNF receptor superfamily, member 6)                 | Literature search |
| <i>FASLG</i>    | ns | 1.104  | Fas ligand (TNF superfamily, member 6)                   | Literature search |
| <i>GZMB</i>     | ns | -1.150 | granzyme B (granzyme 2)                                  | Literature search |
| <i>PRF1</i>     | ns | 1.328  | perforin 1 (pore forming protein)                        | Literature search |
| <i>SRGN</i>     | ns | 1.106  | serglycin                                                | Literature search |
| <i>FKBP1A</i>   | ns | 1.119  | FK506 binding protein 1A, 12kDa                          | Microarray        |
| <i>RORC</i>     | ns | 1.091  | RAR-related orphan receptor C                            | Literature search |
| <i>NCAM1</i>    | ns | 1.056  | neural cell adhesion molecule 1                          | Microarray        |
| <i>SLAMF7</i>   | ns | 1.225  | SLAM family member 7                                     | Microarray        |
| <i>IL2RB</i>    | ns | 1.150  | interleukin 2 receptor, beta                             | Microarray        |
| <i>IL12B</i>    | ns | 1.005  | interleukin 12B                                          | Microarray        |
| <i>KLRF1</i>    | ns | 1.125  | killer cell lectin-like receptor subfamily F, member 1   | Microarray        |
| <i>KLRD1</i>    | ns | 1.078  | killer cell lectin-like receptor subfamily D, member 1   | Microarray        |
| <i>KLRK1</i>    | ns | 1.006  | killer cell lectin-like receptor subfamily K, member 1   | Microarray        |
| <i>KLRC1</i>    | ns | 3.213  | killer cell lectin-like receptor subfamily C, member 1   | Microarray        |
| <i>NCR1</i>     | ns | 1.227  | natural cytotoxicity triggering receptor 1               | Microarray        |
| <i>AP1S2</i>    | ns | 1.114  | adaptor-related protein complex 1, sigma 2               | Microarray        |
| <i>UBD</i>      | ns | -1.428 | ubiquitin D                                              | Microarray        |
| <i>PSMB9</i>    | ns | -1.012 | proteasome (prosome, macropain) subunit 9                | Microarray        |
| <i>SMARCD3</i>  | ns | 3.496  | SWI/SNF related, matrix associated                       | Microarray        |
| <i>BNC2</i>     | ns | 1.005  | basonuclin 2                                             | Microarray        |
| <i>CX3CR1</i>   | ns | 1.033  | chemokine (C-X3-C motif) receptor 1                      | Microarray        |
| <i>LINGO2</i>   | ns | 1.029  | leucine rich repeat and Ig domain containing 2           | Microarray        |
| <i>IGFBP7</i>   | ns | -1.135 | insulin-like growth factor binding protein 7             | Microarray        |
| <i>COL13A1</i>  | ns | 1.139  | collagen, type XIII, alpha 1                             | Microarray        |
| <i>HPRT1</i>    | NA | NA     | hypoxanthine phosphoribosyltransferase 1                 | House-keeping     |
| <i>GAPDH</i>    | NA | NA     | glyceraldehyde 3-phosphate dehydrogenase                 | House-keeping     |
| <i>18s rRNA</i> | NA | NA     | 18S ribosomal RNA                                        | House-keeping     |

<sup>^</sup> Table shows qPCR expression experiments conducted on liver tissue samples collected before initiation of drug minimization in recipients enrolled in Hospital Clinic Barcelona only. Abbreviations: qPCR (real-time PCR), NA (not applicable).

**Supplementary Table 5: Association between tolerance-related qPCR gene expression markers and clinical parameters <sup>A</sup>.**

|                       | <b><i>P</i>-value</b> | <b>Adjusted <i>P</i>-value <sup>B</sup></b> |
|-----------------------|-----------------------|---------------------------------------------|
| <b><i>TFRC</i></b>    | <0.001                | <0.001                                      |
| <b><i>CDHR2</i></b>   | 0.004                 | 0.027                                       |
| <b><i>HMOX1</i></b>   | 0.004                 | 0.031                                       |
| <b><i>IFNG</i></b>    | 0.006                 | 0.003                                       |
| <b><i>HAMP</i></b>    | 0.011                 | 0.053                                       |
| <b><i>MIF</i></b>     | 0.011                 | 0.029                                       |
| <b><i>SLC5A12</i></b> | 0.022                 | 0.136                                       |
| <b><i>PEBP1</i></b>   | 0.037                 | 0.061                                       |
| <b><i>DAB2</i></b>    | 0.047                 | 0.038                                       |
| <b><i>SOCS1</i></b>   | 0.044                 | 0.032                                       |
| <b><i>ADORA3</i></b>  | 0.067                 | 0.064                                       |
| <b><i>TTC3</i></b>    | 0.077                 | 0.181                                       |

<sup>A</sup> Adjustment for clinical parameters was conducted on the qPCR expression data generated employing all available liver tissue samples.

<sup>B</sup> *P*-value adjusted for time since transplantation, recipient gender, recipient age at transplantation, and type of immunosuppressive regimen at enrolment.

**Supplementary Table 6: Multivariable analysis of predictors associated with the development of operational tolerance <sup>A</sup>**

| <b>Clinical parameter</b>                            | <b>Adjusted odds ratio <sup>A</sup></b> | <b><i>P</i>-value</b> | <b>95% confidence interval</b> |
|------------------------------------------------------|-----------------------------------------|-----------------------|--------------------------------|
| <b>Time from transplantation</b> (per year increase) | 1.348                                   | 0.003                 | 1.034-1.762                    |
| <b>Liver tissue transcriptional biomarkers</b>       | 48.953                                  | 0.000                 | 6.983-343.170                  |

<sup>A</sup> Table shows the results of a logistic regression multivariable analysis incorporating recipient age, recipient gender, time since transplantation and class (tolerant/non-tolerant) prediction on the basis of liver tissue transcriptional biomarkers.

<sup>A</sup> Odds ratio of being tolerant over non-tolerant

**Supplementary Table 7: Influence of serum ferritin and clinical parameters on the development of operational tolerance <sup>A</sup>**

| <b>Clinical parameter</b>                             | <b>Adjusted odds ratio <sup>B</sup></b> | <b><i>P</i>-value</b> | <b>95% confidence interval</b> |
|-------------------------------------------------------|-----------------------------------------|-----------------------|--------------------------------|
| <b>Time since transplantation</b> (per year increase) | 1.302                                   | <0.001                | 1.132-1.497                    |
| <b>Serum ferritin</b> (per 10 ng/mL)                  | 1.041                                   | 0.034                 | 1.004-1.079                    |

<sup>A</sup> Table shows the results of a logistic regression multivariable analysis incorporating serum ferritin levels, recipient age, recipient gender, and time since transplantation.

<sup>B</sup> Odds ratio of being tolerant over non-tolerant

**Supplementary Table 8: Differences in hematological and iron-related parameters between tolerant and non-tolerant recipients <sup>A</sup>.**

|                                         | <b>TOL</b>             | <b>Non-TOL</b>          | <b><i>P</i>-value</b> |
|-----------------------------------------|------------------------|-------------------------|-----------------------|
| Hemoglobin (g/L) <sup>B</sup>           | 147.8 (122-170)        | 139.4 (104-176)         | <i>NS</i>             |
| Hematocrit (%) <sup>B</sup>             | 43.5 (35-51)           | 41.3 (32-52)            | <i>NS</i>             |
| MCV (fL) <sup>B</sup>                   | 92.9 (85-109)          | 92.7 (82-103)           | <i>NS</i>             |
| MCHC (g/L) <sup>B</sup>                 | 335.7 (295-370)        | 339 (273.7-469.7)       | <i>NS</i>             |
| Serum Iron (mg/dL) <sup>B</sup>         | 106 (30-244)           | 84 (32-160)             | <i>NS</i>             |
| Serum ferritin (mg/dL) <sup>B</sup>     | 185.5 (26-864)         | 73.5 (3-304)            | 0.0026                |
| Transferrin saturation (%) <sup>B</sup> | 27.3 (17.8-59.4)       | 24.5 (3-56.7)           | <i>NS</i>             |
| sTR <sup>B</sup>                        | 1.28 (0.7-2.15)        | 1.52 (0.8-2.58)         | <i>NS</i>             |
| IDA <sup>C</sup>                        | 0                      | 2 (7%)                  | <i>NS</i>             |
| <i>HFE</i> polymorphism                 | 3 H63D/n,<br>1 C282T/n | 4 H63D/n<br>1 H63D/H63D | <i>NS</i>             |
| C-reactive protein (mg/dL) <sup>B</sup> | 0.47 (0.01-2.04)       | 0.65 (0.02-3.9)         | <i>NS</i>             |

<sup>A</sup> Abbreviations: MCV (mean corpuscular volume), MCHC (mean corpuscular haemoglobin concentration), sTR (soluble transferrin receptor), IDA (iron deficiency anemia), *NS* (not significant).

<sup>B</sup> Mean (range)

<sup>C</sup> Iron deficiency anemia was defined as serum ferritin  $\leq 12$  mg/dL and haemoglobin  $< 12$  g/L in women and  $< 13$  g/L in men. Data are expressed as number of patients (%).

**Supplementary Table 9: Quantification of lymphocyte subsets by immunofluorescence in liver biopsies obtained before immunosuppression drug withdrawal <sup>A</sup>.**

|                                                            | <b>Phenotype</b> | <b>N</b> | <b>Mean (SEM)</b>     |
|------------------------------------------------------------|------------------|----------|-----------------------|
| <b>CD4+/CD8+ ratio</b>                                     | TOL              | 15       | 1.4071<br>(0.103)     |
|                                                            | Non-TOL          | 13       | 1.5705<br>(0.160)     |
| <b>CD4+FoxP3+/CD4+ ratio</b>                               | TOL              | 15       | 0.0342<br>(0.005)     |
|                                                            | Non-TOL          | 13       | 0.0390<br>(0.004)     |
| <b>Treg/Teff</b>                                           | TOL              | 15       | 0.0193<br>(0.002)     |
|                                                            | Non-TOL          | 13       | 0.0231<br>(0.003)     |
| <b>Portal T<sub>eff</sub> density (per mm<sup>2</sup>)</b> | TOL              | 15       | 2292.0<br>(180.337)   |
|                                                            | Non-TOL          | 13       | 1941.0<br>(209.739)   |
| <b>Portal CD8 density (per mm<sup>2</sup>)</b>             | TOL              | 15       | 988.20<br>(94.341)    |
|                                                            | Non-TOL          | 13       | 814.50<br>(111.827)   |
| <b>Portal CD4 density (per mm<sup>2</sup>)</b>             | TOL              | 15       | 1303.8<br>(105.166)   |
|                                                            | Non-TOL          | 13       | 1126.5<br>(118.820)   |
| <b>Portal T<sub>reg</sub> density (per mm<sup>2</sup>)</b> | TOL              | 15       | 43.64<br>(6.581)      |
|                                                            | Non-TOL          | 13       | 45.40<br>(7.709)      |
| <b>Area/portal fields (μm<sup>2</sup>)</b>                 | TOL              | 15       | 18135.6<br>(2333.79)  |
|                                                            | Non-TOL          | 13       | 23021.9<br>(4765.030) |

<sup>A</sup> Abbreviations: Treg (CD4+FOXP3+ lymphocytes), Teff (CD4+FOXP3- and CD8+FOXP3- lymphocytes)



**Supplementary Table 10: List of genes assessed in PBMCs employing Fluidigm qPCR gene expression**

| <b>Gene Symbol</b> | <b>Name</b>                                                          | <b>Gene Symbol</b> | <b>Name</b>                                                 |
|--------------------|----------------------------------------------------------------------|--------------------|-------------------------------------------------------------|
| <i>ABCB1</i>       | ATP-binding cassette, sub-family B member 1                          | <i>KLRB1</i>       | killer cell lectin-like receptor subfamily B, member 1      |
| <i>AHNAK</i>       | AHNAK nucleoprotein                                                  | <i>KLRC4</i>       | killer cell lectin-like receptor subfamily C, member 4      |
| <i>ALG8</i>        | asparagine-linked glycosylation 8                                    | <i>KLRD1</i>       | killer cell lectin-like receptor subfamily D, member 1      |
| <i>AMMECR1</i>     | Alport syndrome chromosomal region gene 1                            | <i>KLRF1</i>       | killer cell lectin-like receptor subfamily F, member 1      |
| <i>ANKRD12</i>     | ankyrin repeat domain 12                                             | <i>LAIR2</i>       | leukocyte-associated immunoglobulin-like receptor 2         |
| <i>ARFGEF2</i>     | ADP-ribosylation factor guanine nucleotide-exchange factor 2         | <i>LSM12</i>       | LSM12 homolog ( <i>S. cerevisiae</i> )                      |
| <i>B2M</i>         | beta-2-microglobulin                                                 | <i>LUC7L3</i>      | LUC7-like 3 ( <i>S. cerevisiae</i> )                        |
| <i>BAT2L2</i>      | HLA-B associated transcript 2-like 2                                 | <i>MAN1A1</i>      | mannosidase, alpha, class 1A, member 1                      |
| <i>BNC2</i>        | basonuclin 2                                                         | <i>NAAA</i>        | N-acylethanolamine acid amidase                             |
| <i>BZRAP1</i>      | benzodiazepine receptor associated protein 1                         | <i>NAA15</i>       | N(alpha)-acetyltransferase 15, NatA auxiliary subunit       |
| <i>C6orf62</i>     | chromosome 6 open reading frame 62                                   | <i>NCALD</i>       | neurocalcin delta                                           |
| <i>C9orf103</i>    | chromosome 9 open reading frame 103                                  | <i>NCAM1</i>       | neural cell adhesion molecule 1 / CD56                      |
| <i>CD9</i>         | CD9 molecule, tetraspanin-29                                         | <i>NCR1</i>        | natural cytotoxicity triggering receptor 1                  |
| <i>CDC42SE1</i>    | CDC42 small effector 1                                               | <i>NIPBL</i>       | Nipped-B homolog ( <i>Drosophila</i> )                      |
| <i>CD160</i>       | CD160 molecule, Natural killer cell receptor BY55                    | <i>NKG7</i>        | natural killer cell group 7 sequence                        |
| <i>CD244</i>       | CD244 molecule, natural killer cell receptor 2B4                     | <i>OSBPL5</i>      | oxysterol binding protein-like 5                            |
| <i>CLIC3</i>       | chloride intracellular channel 3                                     | <i>PDE4B</i>       | phosphodiesterase 4B, cAMP-specific                         |
| <i>CNOT7</i>       | CCR4-NOT transcription complex, subunit 7                            | <i>PDGFRB</i>      | platelet-derived growth factor receptor, beta polypeptide   |
| <i>CTBP2</i>       | C-terminal binding protein 2                                         | <i>PION</i>        | pigeon homolog ( <i>Drosophila</i> )                        |
| <i>CTSZ</i>        | cathepsin Z                                                          | <i>PTCH1</i>       | patched 1                                                   |
| <i>CX3CR1</i>      | chemokine (C-X3-C motif) receptor 1                                  | <i>PTGDR</i>       | prostaglandin D2 receptor (DP)                              |
| <i>DAB2</i>        | disabled homolog 2 ( <i>Drosophila</i> )                             | <i>PP1G</i>        | peptidylprolyl isomerase G (cyclophilin G)                  |
| <i>DENND1B</i>     | DENN/MADD domain containing 1B                                       | <i>PSMD14</i>      | proteasome (prosome, macropain) 26S subunit, non-ATPase, 14 |
| <i>DIS3</i>        | DIS3 mitotic control homolog ( <i>S. cerevisiae</i> )                | <i>RASGEF1A</i>    | RasGEF domain family, member 1A                             |
| <i>DUSP2</i>       | dual specificity phosphatase 2                                       | <i>RGS3</i>        | regulator of G-protein signaling 3                          |
| <i>ERBB2</i>       | erythroblastic leukemia viral oncogene homolog 2                     | <i>RPL27A</i>      | ribosomal protein L27a                                      |
| <i>EPS8</i>        | epidermal growth factor receptor pathway substrate 8                 | <i>RPL31</i>       | ribosomal protein L31                                       |
| <i>ERGIC2</i>      | ERGIC and golgi 2                                                    | <i>RPL37A</i>      | ribosomal protein L37a                                      |
| <i>FANCG</i>       | Fanconi anemia, complementation group G                              | <i>RPL38</i>       | ribosomal protein L38                                       |
| <i>FEM1C</i>       | fem-1 homolog c ( <i>C. elegans</i> )                                | <i>RPS11</i>       | ribosomal protein S11                                       |
| <i>FEZ1</i>        | fasciculation and elongation protein zeta 1 (zygin 1)                | <i>RSBN1L</i>      | round spermatid basic protein 1-like                        |
| <i>FLJ14213</i>    | proline rich 5 like                                                  | <i>SAMHD1</i>      | SAM domain and HD domain 1                                  |
| <i>GEMIN7</i>      | gem (nuclear organelle) associated protein 7                         | <i>SCRIB</i>       | scribbled homolog ( <i>Drosophila</i> )                     |
| <i>GFOD1</i>       | glucose-fructose oxidoreductase domain containing 1                  | <i>SH2D1B</i>      | SH2 domain containing 1B                                    |
| <i>GNG2</i>        | guanine nucleotide binding protein (G protein), gamma 2              | <i>SIRPB1</i>      | signal-regulatory protein beta 1                            |
| <i>GNPTAB</i>      | N-acetylglucosamine-1-phosphate transferase, alpha and beta subunits | <i>SKI</i>         | v-ski sarcoma viral oncogene homolog (avian)                |
| <i>GP9</i>         | glycoprotein IX (platelet)                                           | <i>SLAMF7</i>      | SLAM family member 7                                        |
| <i>GZMB</i>        | granzyme B                                                           | <i>SLC16A7</i>     | solute carrier family 16, member 7                          |
| <i>HBA1;HBA2</i>   | hemoglobin, alpha 1;hemoglobin, alpha 2                              | <i>TCL1A</i>       | T-cell leukemia/lymphoma 1A                                 |
| <i>HBG1;HBG2</i>   | hemoglobin, gamma A;hemoglobin, gamma G                              | <i>TRA@</i>        | T cell receptor alpha locus                                 |
| <i>HIGD2A</i>      | HIG1 hypoxia inducible domain family, member 2A                      | <i>TRD@</i>        | T cell receptor delta locus                                 |
| <i>HLA-DQA1</i>    | major histocompatibility complex, class II, DQ alpha 1               | <i>UBD</i>         | ubiquitin D                                                 |
| <i>HPRT1</i>       | hypoxanthine phosphoribosyltransferase 1                             | <i>WDR67</i>       | WD repeat domain 67                                         |
| <i>IL2RB</i>       | interleukin 2 receptor, beta                                         | <i>YWHAZ</i>       | tyrosine 3-monooxygenase zeta polypeptide                   |
| <i>IL8</i>         | interleukin 8                                                        | <i>ZMIZ2</i>       | zinc finger, MIZ-type containing 2                          |
| <i>ITGA2B</i>      | integrin, alpha 2b (CD41)                                            | <i>ZNF267</i>      | zinc finger protein 267                                     |
| <i>KDM1B</i>       | lysine (K)-specific demethylase 1B                                   | <i>ZNF295</i>      | zinc finger protein 295                                     |
| <i>KIAA0100</i>    | KIAA0100                                                             | <i>18S</i>         | Eukaryotic 18S rRNA                                         |

**Supplementary Table 11: Genes differentially expressed in PBMCs between operationally tolerant and non-tolerant recipients before start of drug minimization (FDR<5%, fold change  $\pm$  1.32)**

| <b>Probeset</b> | <b>Gene Symbol</b> | <b>Accession Number</b> | <b>GeneName</b>                                                        | <b>Fold change (Tolerant vs Non-tolerant)</b> |
|-----------------|--------------------|-------------------------|------------------------------------------------------------------------|-----------------------------------------------|
| 211654_x_at     | HLA-DQB1           | M17565                  | major histocompatibility complex. class II. DQ beta 1                  | 1.820                                         |
| 205249_at       | EGR2               | NM_000399               | early growth response 2                                                | 1.767                                         |
| 210690_at       | KLRC4              | U96845                  | killer cell lectin-like receptor subfamily C. member 4                 | 1.742                                         |
| 207723_s_at     | KLRC3              | NM_002261               | killer cell lectin-like receptor subfamily C. member 3                 | 1.639                                         |
| 1560172_at      | INTS10             | AK092931                | integrator complex subunit 10                                          | 1.631                                         |
| 210286_s_at     | SLC4A7             | AF053755                | solute carrier family 4. sodium bicarbonate cotransporter. member 7    | 1.627                                         |
| 234165_at       | PTGDR              | AK026202                | prostaglandin D2 receptor (DP)                                         | 1.617                                         |
| 204794_at       | DUSP2              | NM_004418               | dual specificity phosphatase 2                                         | 1.613                                         |
| 208937_s_at     | ID1                | D13889                  | inhibitor of DNA binding 1. dominant negative helix-loop-helix protein | 1.585                                         |
| 201681_s_at     | DLG5               | AB011155                | discs. large homolog 5 (Drosophila)                                    | 1.563                                         |
| 205239_at       | AREG               | NM_001657               | amphiregulin                                                           | 1.552                                         |
| 230967_s_at     | USP7               | BF433061                | ubiquitin specific peptidase 7 (herpes virus-associated)               | 1.549                                         |
| 213524_s_at     | G0S2               | NM_015714               | G0/G1switch 2                                                          | 1.536                                         |
| 219630_at       | PDZK1IP1           | NM_005764               | PDZK1 interacting protein 1                                            | 1.536                                         |
| 207724_s_at     | SPAST              | NM_014946               | spastin                                                                | 1.535                                         |
| 206115_at       | EGR3               | NM_004430               | early growth response 3                                                | 1.520                                         |
| 231996_at       | N4BP2              | AB037834                | NEDD4 binding protein 2                                                | 1.514                                         |
| 207072_at       | IL18RAP            | NM_003853               | interleukin 18 receptor accessory protein                              | 1.511                                         |
| 227803_at       | ENPP5              | AA609053                | ectonucleotide pyrophosphatase/phosphodiesterase 5 (putative function) | 1.494                                         |
| 206370_at       | PIK3CG             | NM_002649               | phosphoinositide-3-kinase. catalytic. gamma polypeptide                | 1.487                                         |
| 1553176_at      | SH2D1B             | AF403479                | SH2 domain containing 1B                                               | 1.460                                         |
| 220646_s_at     | KLRF1              | NM_016523               | killer cell lectin-like receptor subfamily F. member 1                 | 1.460                                         |
| 211597_s_at     | HOPX               | AB059408                | HOP homeobox                                                           | 1.453                                         |
| 238478_at       | BNC2               | H97386                  | basonuclin 2                                                           | 1.451                                         |
| 216834_at       | RGS1               | S59049                  | regulator of G-protein signaling 1                                     | 1.447                                         |
| 37145_at        | GNLY               | M85276                  | granulysin                                                             | 1.444                                         |
| 207793_s_at     | EPB41              | NM_004437               | erythrocyte membrane protein band 4.1 (elliptocytosis 1. RH-linked)    | 1.440                                         |
| 207246_at       | ZFY                | NM_003411               | zinc finger protein. Y-linked                                          | 1.440                                         |
| 227394_at       | NCAM1              | W94001                  | neural cell adhesion molecule 1                                        | 1.437                                         |
| 1559979_at      | SYF2               | BC015824                | SYF2 homolog. RNA splicing factor (S. cerevisiae)                      | 1.427                                         |
| 223946_at       | MED23              | AL136776                | mediator complex subunit 23                                            | 1.423                                         |
| 232027_at       | SYNE1              | AL049548                | spectrin repeat containing. nuclear envelope 1                         | 1.421                                         |
| 1560014_s_at    | PDXDC1             | AI133523                | pyridoxal-dependent decarboxylase domain containing 1                  | 1.420                                         |
| 206366_x_at     | XCL1               | U23772                  | chemokine (C motif) ligand 1                                           | 1.418                                         |
| 1557257_at      | BCL10              | AA994334                | B-cell CLL/lymphoma 10                                                 | 1.417                                         |
| 1563498_s_at    | SLC25A45           | AK090434                | solute carrier family 25. member 45                                    | 1.413                                         |
| 212070_at       | GPR56              | AL554008                | G protein-coupled receptor 56                                          | 1.408                                         |

|              |              |           |                                                                                  |        |
|--------------|--------------|-----------|----------------------------------------------------------------------------------|--------|
| 224231_at    | PRO0471      | AF111846  | hypothetical LOC28994                                                            | 1.407  |
| 202887_s_at  | DDIT4        | NM_019058 | DNA-damage-inducible transcript 4                                                | 1.406  |
| 215581_s_at  | MCM3AP       | AK022303  | minichromosome maintenance complex component 3 associated protein                | 1.405  |
| 226809_at    | LOC100216479 | AW188087  | hypothetical LOC100216479                                                        | 1.403  |
| 1558697_a_at | KIAA0430     | BI600341  | KIAA0430                                                                         | 1.401  |
| 1558859_at   | LOC222159    | AK027340  | hypothetical protein LOC222159                                                   | 1.397  |
| 229614_at    | ZNF320       | AI277652  | zinc finger protein 320                                                          | 1.397  |
| 212509_s_at  | MXRA7        | BF968134  | matrix-remodelling associated 7                                                  | 1.394  |
| 228789_at    | MTMR6        | AI290971  | myotubularin related protein 6                                                   | 1.389  |
| 238438_at    | CNOT6L       | R67226    | CCR4-NOT transcription complex. subunit 6-like                                   | 1.380  |
| 218638_s_at  | SPON2        | NM_012445 | spondin 2. extracellular matrix protein                                          | 1.377  |
| 205291_at    | IL2RB        | NM_000878 | interleukin 2 receptor. beta                                                     | 1.375  |
| 1554549_a_at | WDR20        | BC030654  | WD repeat domain 20                                                              | 1.371  |
| 203921_at    | CHST2        | NM_004267 | carbohydrate (N-acetylglucosamine-6-O) sulfotransferase 2                        | 1.371  |
| 230120_s_at  | PLGLB2       | AI088455  | plasminogen-like B2                                                              | 1.371  |
| 207840_at    | CD160        | NM_007053 | CD160 molecule                                                                   | 1.366  |
| 242463_x_at  | ZNF600       | AI620827  | zinc finger protein 600                                                          | 1.364  |
| 241495_at    | CCNL1        | AI675298  | cyclin L1                                                                        | 1.359  |
| 205883_at    | ZBTB16       | NM_006006 | zinc finger and BTB domain containing 16                                         | 1.356  |
| 227798_at    | SMAD1        | AU146891  | SMAD family member 1                                                             | 1.356  |
| 202644_s_at  | TNFAIP3      | NM_006290 | tumor necrosis factor. alpha-induced protein 3                                   | 1.356  |
| 232568_at    | MGC24103     | AU145658  | hypothetical MGC24103                                                            | 1.353  |
| 227473_at    | CTTN         | N45140    | cortactin                                                                        | 1.350  |
| 1555963_x_at | B3GNT7       | CA503291  | UDP-GlcNAc:betaGal beta-1.3-N-acetylglucosaminyltransferase 7                    | 1.350  |
| 203562_at    | FEZ1         | NM_005103 | fasciculation and elongation protein zeta 1 (zygin I)                            | 1.343  |
| 235333_at    | B4GALT6      | BG503479  | UDP-Gal:betaGlcNAc beta 1.4- galactosyltransferase. polypeptide 6                | 1.342  |
| 236316_at    | FAM3C        | AW015417  | family with sequence similarity 3. member C                                      | 1.340  |
| 204013_s_at  | LCMT2        | NM_014793 | leucine carboxyl methyltransferase 2                                             | 1.340  |
| 208122_x_at  | KIR2DS3      | NM_012313 | killer cell immunoglobulin-like receptor. two domains. short cytoplasmic tail. 3 | 1.338  |
| 211685_s_at  | NCALD        | AF251061  | neurocalcin delta                                                                | 1.337  |
| 210148_at    | HIPK3        | AF305239  | homeodomain interacting protein kinase 3                                         | 1.330  |
| 1553698_a_at | C1orf96      | NM_145257 | chromosome 1 open reading frame 96                                               | 1.325  |
| 209795_at    | CD69         | L07555    | CD69 molecule                                                                    | 1.324  |
| 203502_at    | BPGM         | NM_001724 | 2.3-bisphosphoglycerate mutase                                                   | 1.323  |
| 239384_at    | FLJ44342     | R18746    | hypothetical LOC645460                                                           | 1.323  |
| 217591_at    | SKIL         | BF725121  | SKI-like oncogene                                                                | 1.323  |
| 222139_at    | KIAA1466     | AI765383  | KIAA1466 gene                                                                    | 1.322  |
| 1554309_at   | EIF4G3       | BC030578  | eukaryotic translation initiation factor 4 gamma. 3                              | 1.322  |
| 240413_at    | PYHIN1       | AI827431  | pyrin and HIN domain family. member 1                                            | 1.320  |
| 1563502_at   | ZDHHC2       | AL833080  | zinc finger. DHHC-type containing 2                                              | -1.320 |
| 243764_at    | VSIG1        | AW085312  | V-set and immunoglobulin domain containing 1                                     | -1.321 |
| 204995_at    | CDK5R1       | AL567411  | cyclin-dependent kinase 5. regulatory subunit 1 (p35)                            | -1.322 |
| 215505_s_at  | STRN3        | AF243424  | striatin. calmodulin binding protein 3                                           | -1.323 |
| 221916_at    | NEFL         | BF055311  | neurofilament. light polypeptide                                                 | -1.325 |
| 226065_at    | PRICKLE1     | N98595    | prickle homolog 1 (Drosophila)                                                   | -1.325 |
| 229420_at    | RPL23A       | AI557425  | ribosomal protein L23a                                                           | -1.329 |
| 218232_at    | C1QA         | NM_015991 | complement component 1. q subcomponent. A chain                                  | -1.330 |
| 235306_at    | GIMAP8       | AI611648  | GTPase. IMAP family member 8                                                     | -1.332 |
| 228170_at    | OLIG1        | AL355743  | oligodendrocyte transcription factor 1                                           | -1.338 |

|              |              |           |                                                                             |        |
|--------------|--------------|-----------|-----------------------------------------------------------------------------|--------|
| 214052_x_at  | BAT2L2       | AW301305  | HLA-B associated transcript 2-like 2                                        | -1.344 |
| 1559882_at   | SAMHD1       | AF147427  | SAM domain and HD domain 1                                                  | -1.345 |
| 206343_s_at  | NRG1         | NM_013959 | neuregulin 1                                                                | -1.347 |
| 227074_at    | LOC100131564 | AA524669  | hypothetical protein LOC100131564                                           | -1.347 |
| 226322_at    | TMTC1        | BF109231  | transmembrane and tetratricopeptide repeat containing 1                     | -1.348 |
| 221960_s_at  | RAB2A        | AI189609  | RAB2A. member RAS oncogene family                                           | -1.349 |
| 243106_at    | CLEC12A      | AA916861  | C-type lectin domain family 12. member A                                    | -1.352 |
| 210172_at    | SF1          | D26121    | splicing factor 1                                                           | -1.360 |
| 221288_at    | GPR22        | NM_005295 | G protein-coupled receptor 22                                               | -1.374 |
| 232315_at    | ZNF880       | AU149712  | zinc finger protein 880                                                     | -1.377 |
| 1560112_at   | WDFY2        | AK054833  | WD repeat and FYVE domain containing 2                                      | -1.384 |
| 242197_x_at  | CD36         | W95035    | CD36 molecule (thrombospondin receptor)                                     | -1.388 |
| 205758_at    | CD8A         | AW006735  | CD8a molecule                                                               | -1.390 |
| 224567_x_at  | MALAT1       | BG534952  | metastasis associated lung adenocarcinoma transcript 1 (non-protein coding) | -1.393 |
| 1555878_at   | RPS24        | AK094613  | ribosomal protein S24                                                       | -1.397 |
| 216563_at    | ANKRD12      | X80821    | ankyrin repeat domain 12                                                    | -1.407 |
| 236808_at    | FGFR1OP2     | AA947475  | FGFR1 oncogene partner 2                                                    | -1.408 |
| 240159_at    | SLC15A2      | AA836116  | solute carrier family 15 (H+/peptide transporter). member 2                 | -1.409 |
| 203096_s_at  | RAPGEF2      | BF439282  | Rap guanine nucleotide exchange factor (GEF) 2                              | -1.410 |
| 1566040_at   | LOC100288656 | BM263698  | similar to hCG2003116                                                       | -1.418 |
| 222027_at    | NUCKS1       | AW515443  | nuclear casein kinase and cyclin-dependent kinase substrate 1               | -1.418 |
| 239891_x_at  | RAB12        | AA001052  | RAB12. member RAS oncogene family                                           | -1.419 |
| 239487_at    | FAM98A       | AI743261  | family with sequence similarity 98. member A                                | -1.419 |
| 230557_at    | XRRA1        | AW513519  | X-ray radiation resistance associated 1                                     | -1.421 |
| 234849_at    | TRA@         | AE000659  | T cell receptor alpha locus                                                 | -1.424 |
| 1554544_a_at | MBP          | L18865    | myelin basic protein                                                        | -1.426 |
| 223620_at    | GPR34        | AF039686  | G protein-coupled receptor 34                                               | -1.431 |
| 207826_s_at  | ID3          | NM_002167 | inhibitor of DNA binding 3. dominant negative helix-loop-helix protein      | -1.432 |
| 208920_at    | SRI          | AV752215  | sorcin                                                                      | -1.452 |
| 229028_s_at  | ARL17B       | W73694    | ADP-ribosylation factor-like 17B                                            | -1.509 |
| 237625_s_at  | IGKC         | BG548679  | immunoglobulin kappa constant                                               | -1.556 |
| 231647_s_at  | FCRL5        | AW241983  | Fc receptor-like 5                                                          | -1.557 |
| 1562338_at   | MARCH1       | BQ718095  | membrane-associated ring finger (C3HC4) 1                                   | -1.601 |
| 238149_at    | ZNF818P      | AI651641  | zinc finger protein 818 (pseudogene)                                        | -1.602 |
| 238465_at    | C5orf35      | AI265933  | chromosome 5 open reading frame 35                                          | -1.610 |
| 202203_s_at  | AMFR         | NM_001144 | autocrine motility factor receptor                                          | -1.692 |
| 206765_at    | KCNJ2        | AF153820  | potassium inwardly-rectifying channel. subfamily J. member 2                | -2.150 |
| 239412_at    | IRF5         | BF223643  | interferon regulatory factor 5                                              | -2.428 |

**Supplementary Table 12: Gene sets enriched in the tolerance-related transcriptional profile at baseline**

| <b>Enriched in tolerant recipients</b>     | <b>p-value</b> | <b>q-value</b> | <b>Genes with highest enrichment scores</b>                                                                        | <b>Gene set database</b> |
|--------------------------------------------|----------------|----------------|--------------------------------------------------------------------------------------------------------------------|--------------------------|
| Natural Killer (CD56) cell lineage         | 0.000          | 0.000          | <i>KLRC3, NCAM1, CD160, BNC2, KIR3DL2, LAIR2, SH2D1B, KIR3DL1, KLRF1, CLIC3, AKR1C3, FEZ1, PDGFRB, GZMB, IL2RB</i> | Haematlas                |
| Graft versus host disease                  | 0.000          | 0.000          | <i>KIR3DL1, KIR3DL2, KIR3DL3, KIR2DL1, GZMB, KIR2DL5A, KLRD1</i>                                                   | KEGG                     |
| Antigen processing and presentation        | 0.000          | 0.000          | <i>KLRC4, KLRC3, KIR3DL2, KIR3DL1, KIR2DS3, KIR2DS4, KIR2DL5A, KIR2DL1, KIR2DS1, KLRD1</i>                         | KEGG                     |
| Natural Killer cell mediated cytotoxicity  | 0.000          | 0.001          | <i>KLRC3, KIR3DL2, SH2D1B, KIR3DL1, KIR2DL2, GZMB, KIR2DL1, TNF, KLRD1, KIR2DL3</i>                                | Biocarta                 |
| VIP pathway                                | 0.000          | 0.001          | <i>EGR3, EGR2, PRKAR1B, NFKBIA, PRKAR2B, NFATC2, PPP3CC</i>                                                        | KEGG                     |
| DARPP32 events                             | 0.000          | 0.006          | <i>PDE4D, PRKAR2B, PRKAR2B, PPP3R1, PDE4B, PPP3C.</i>                                                              | Biocarta                 |
| Immunoregulatory interactions              | 0.000          | 0.013          | <i>CD160, KIR3DL2, KIR3DL1, KIR2DL2, KIR2DS2, KIR2DL3, CD226, KIR2DL1, ICAM4</i>                                   | Reactome                 |
| Differentiation pathway in PC12 cells      | 0.000          | 0.015          | <i>EGR3, EGR2, EGR1, JUN</i>                                                                                       | Reactome                 |
| Muscle cell differentiation                | 0.000          | 0.018          | <i>EREG, IGFBP3, GLMN, NOTCH1, SYNE1, BOC, ACTA1</i>                                                               | C2                       |
| Muscle contraction                         | 0.000          | 0.084          | <i>ACTA2, NEB, MYL4, MYL9, TNNC1, MYLK, ITGB5, DES</i>                                                             | Gene Ontology            |
| NTHI pathway                               | 0.002          | 0.082          | <i>IL8, TNF, IL1B, NFKBIA, TGFB1, DUSP1, CHUK, MAP2K6</i>                                                          | Biocarta                 |
| <b>Enriched in non-tolerant recipients</b> |                |                |                                                                                                                    |                          |
| Monocyte (CD14) cell lineage               | 0.000          | 0.105          | <i>CXCL10, NRG1, SASH1, CTSZ, C1QA, FUCA1, EDG3, ASAH1.</i>                                                        | Haematlas                |

**Supplementary Table 13: List of genes differentially expressed between TOL and Non-TOL PBMC samples at baseline**

| <b>Gene Symbol</b> | <b>Fold change</b> | <b>p-value</b> |
|--------------------|--------------------|----------------|
| <i>SH2D1B</i>      | 1.70               | 0.004          |
| <i>CLIC3</i>       | 1.73               | 0.006          |
| <i>PSMD14</i>      | 1.79               | 0.006          |
| <i>NCAM1</i>       | 1.49               | 0.010          |
| <i>IL2RB</i>       | 1.31               | 0.012          |
| <i>PDGFRB</i>      | 1.62               | 0.013          |
| <i>GZMB</i>        | 1.31               | 0.019          |
| <i>NCR1</i>        | 1.47               | 0.023          |
| <i>GNG2</i>        | 1.15               | 0.031          |
| <i>KLRF1</i>       | 1.58               | 0.031          |
| <i>KLRC4</i>       | 1.31               | 0.037          |
